# Supplementary material for: The potential role of temperate Japanese regions as refugia for the coral Acropora hyacinthus in the face of climate change
Source: PubMed Central journal article supplement (PMC6374466; doi:10.1038/s41598-018-38333-5), 2019-02-13
Supplement: 41598_2018_38333_MOESM2_ESM.pdf [file 41598_2018_38333_MOESM2_ESM.pdf]

## **Supplementary data**

**Title:** The potential role of temperate Japanese regions as refugia for the coral *Acropora hyacinthus* in the face of climate change

Authors: Aki Nakabayashi, Takehisa Yamakita, Takashi Nakamura, Hiroaki Aizawa, Yuko F Kitano, Akira Iguchi, Hiroya Yamano, Satoshi Nagai, Agostini Sylvain, Kosuke M. Teshima, Nina Yasuda.

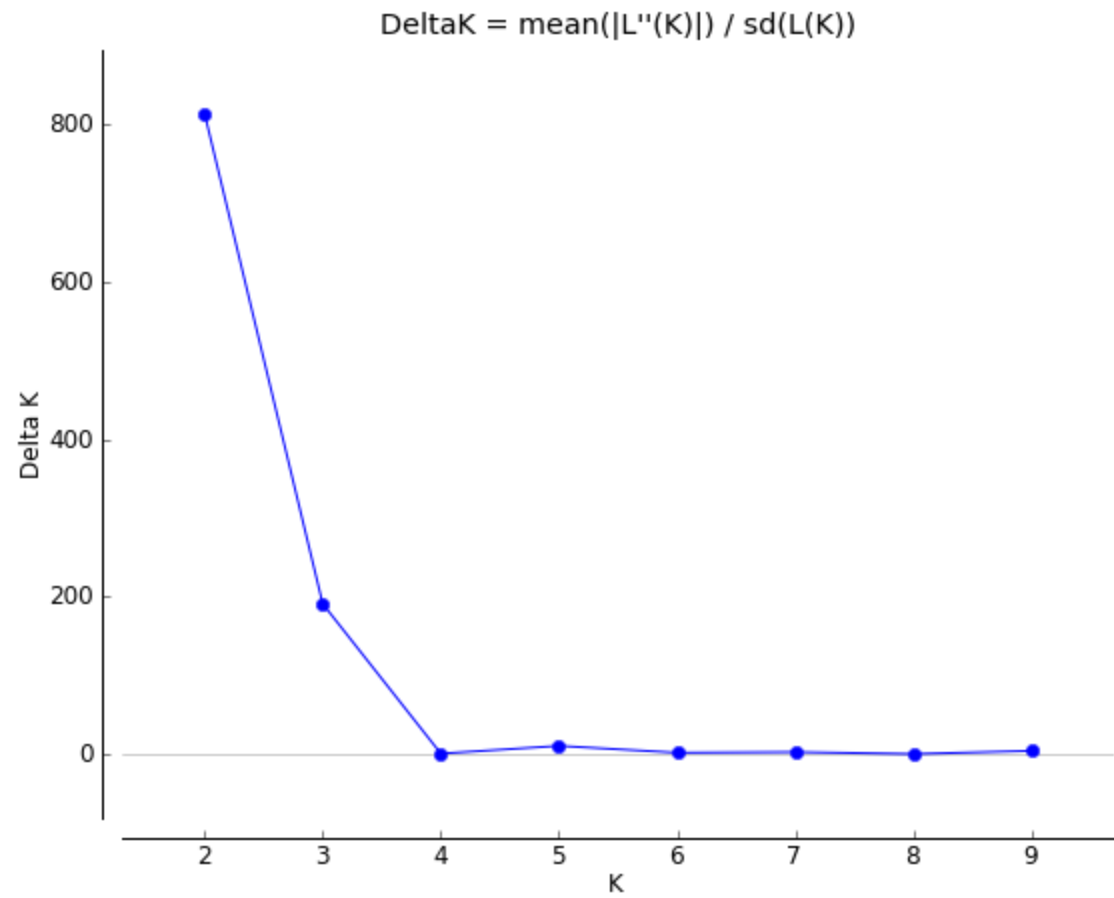

Suppl. 1 Delta K estimation of STRUCTURE analysis using whole data sets including cryptic lineages.

Suppl. 2 Neighbour-joining tree using Nei's genetic distance (Da) among populations after separating into cryptic lineages. (a)  $K=2$  and (b)  $K=3$ . Numbers are bootstrap values.

(a)

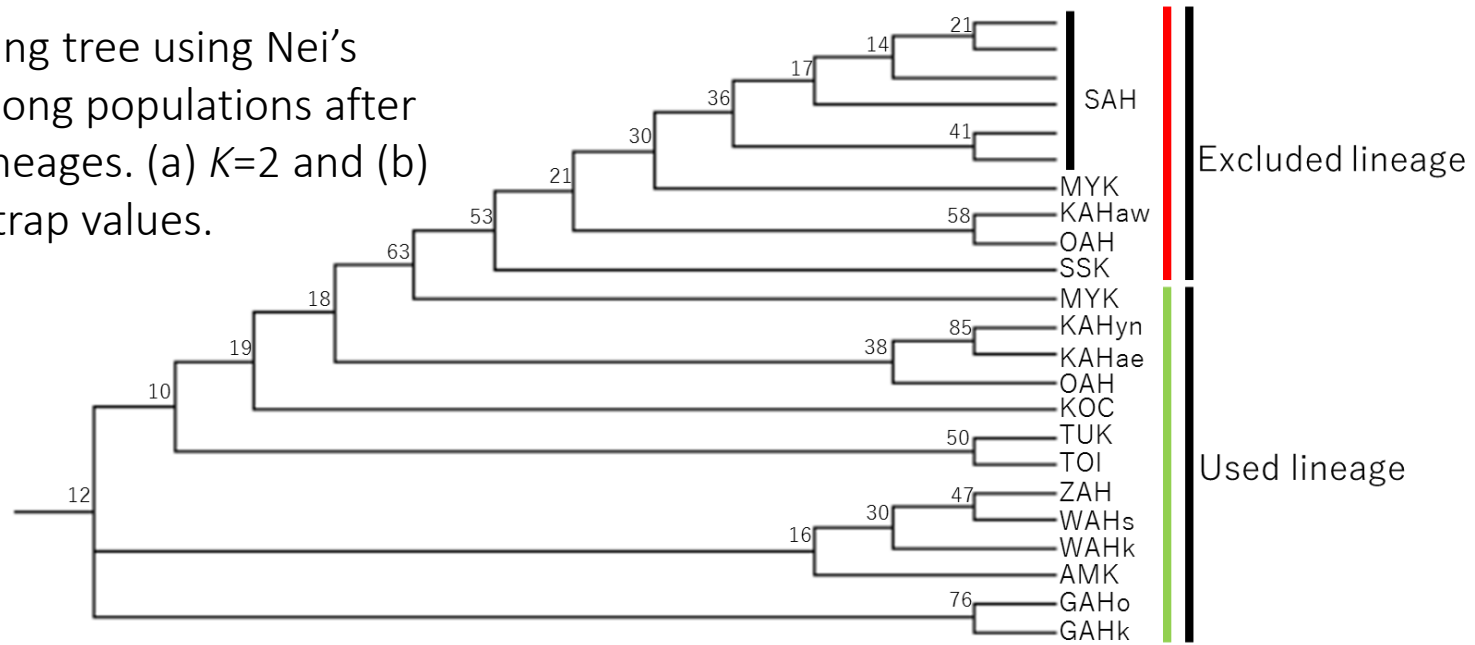

(b)

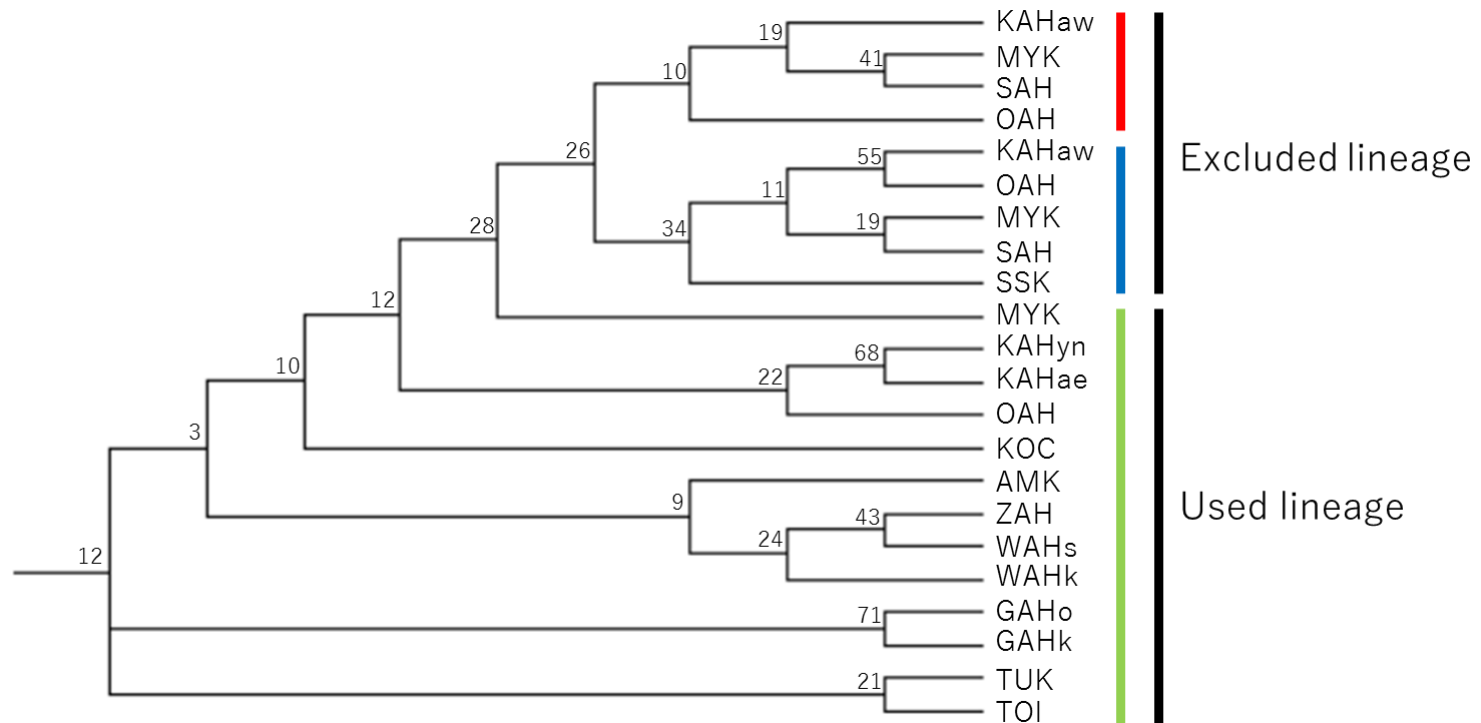

**Suppl. 3** Genetic variability of each locus within each population. Number of samples (N); number of alleles (Na); number of effective alleles (Ne); Information Index (I); Observed (Ho); Expected (He) and Unbiased (UHe) Heterozygosities; and Fixation Index (F).

| Pop      | Locus    | N       | Na | Ne    | I     | Ho    | He    | UHe   | F      |        |
|----------|----------|---------|----|-------|-------|-------|-------|-------|--------|--------|
| GAHo     | 8346m3   | 9       | 2  | 1.246 | 0.349 | 0.222 | 0.198 | 0.209 | -0.125 |        |
|          | 11401m4  | 9       | 5  | 3.857 | 1.459 | 0.778 | 0.741 | 0.784 | -0.050 |        |
|          | 8499m4   | 9       | 1  | 1.000 | 0.000 | 0.000 | 0.000 | 0.000 | #N/A   |        |
|          | Amil2-2  | 9       | 2  | 1.670 | 0.591 | 0.556 | 0.401 | 0.425 | -0.385 |        |
|          | Amil2-23 | 9       | 1  | 1.000 | 0.000 | 0.000 | 0.000 | 0.000 | #N/A   |        |
|          | Amil2-10 | 9       | 3  | 1.256 | 0.426 | 0.111 | 0.204 | 0.216 | 0.455  |        |
|          | Amil2-12 | 9       | 1  | 1.000 | 0.000 | 0.000 | 0.000 | 0.000 | #N/A   |        |
|          | 10366m5  | 9       | 4  | 2.348 | 1.014 | 0.111 | 0.574 | 0.608 | 0.806  |        |
|          | GAHk     | 8346m3  | 10 | 1     | 1.000 | 0.000 | 0.000 | 0.000 | 0.000  | #N/A   |
|          |          | 11401m4 | 10 | 4     | 2.353 | 1.063 | 0.300 | 0.575 | 0.605  | 0.478  |
| 8499m4   |          | 10      | 3  | 1.361 | 0.518 | 0.300 | 0.265 | 0.279 | -0.132 |        |
| Amil2-2  |          | 10      | 2  | 1.105 | 0.199 | 0.100 | 0.095 | 0.100 | -0.053 |        |
| Amil2-23 |          | 10      | 1  | 1.000 | 0.000 | 0.000 | 0.000 | 0.000 | #N/A   |        |
| Amil2-10 |          | 10      | 1  | 1.000 | 0.000 | 0.000 | 0.000 | 0.000 | #N/A   |        |
| Amil2-12 |          | 10      | 1  | 1.000 | 0.000 | 0.000 | 0.000 | 0.000 | #N/A   |        |
| 10366m5  |          | 10      | 6  | 3.704 | 1.495 | 0.300 | 0.730 | 0.768 | 0.589  |        |
| AMK      |          | 8346m3  | 23 | 2     | 1.240 | 0.344 | 0.130 | 0.194 | 0.198  | 0.327  |
|          |          | 11401m4 | 22 | 9     | 5.095 | 1.858 | 0.727 | 0.804 | 0.822  | 0.095  |
|          | 8499m4   | 23      | 4  | 1.666 | 0.798 | 0.304 | 0.400 | 0.409 | 0.239  |        |
|          | Amil2-2  | 23      | 4  | 1.195 | 0.386 | 0.174 | 0.164 | 0.167 | -0.064 |        |
|          | Amil2-23 | 23      | 1  | 1.000 | 0.000 | 0.000 | 0.000 | 0.000 | #N/A   |        |
|          | Amil2-10 | 23      | 1  | 1.000 | 0.000 | 0.000 | 0.000 | 0.000 | #N/A   |        |
|          | Amil2-12 | 21      | 1  | 1.000 | 0.000 | 0.000 | 0.000 | 0.000 | #N/A   |        |
|          | 10366m5  | 23      | 5  | 3.317 | 1.346 | 0.130 | 0.698 | 0.714 | 0.813  |        |
|          | ZAH      | 8346m3  | 17 | 1     | 1.000 | 0.000 | 0.000 | 0.000 | 0.000  | #N/A   |
|          |          | 11401m4 | 15 | 6     | 2.332 | 1.242 | 0.333 | 0.571 | 0.591  | 0.416  |
| 8499m4   |          | 16      | 2  | 1.205 | 0.311 | 0.188 | 0.170 | 0.175 | -0.103 |        |
| Amil2-2  |          | 17      | 3  | 1.438 | 0.578 | 0.353 | 0.304 | 0.314 | -0.159 |        |
| Amil2-23 |          | 17      | 1  | 1.000 | 0.000 | 0.000 | 0.000 | 0.000 | #N/A   |        |
| Amil2-10 |          | 17      | 2  | 1.061 | 0.133 | 0.059 | 0.057 | 0.059 | -0.030 |        |
| Amil2-12 |          | 17      | 2  | 1.061 | 0.133 | 0.059 | 0.057 | 0.059 | -0.030 |        |
| 10366m5  |          | 16      | 8  | 2.829 | 1.397 | 0.375 | 0.646 | 0.667 | 0.420  |        |
| WAHk     |          | 8346m3  | 29 | 1     | 1.000 | 0.000 | 0.000 | 0.000 | 0.000  | #N/A   |
|          |          | 11401m4 | 29 | 7     | 3.602 | 1.502 | 0.517 | 0.722 | 0.735  | 0.284  |
|          | 8499m4   | 28      | 6  | 2.469 | 1.210 | 0.429 | 0.595 | 0.606 | 0.280  |        |
|          | Amil2-2  | 29      | 3  | 1.482 | 0.616 | 0.310 | 0.325 | 0.331 | 0.046  |        |
|          | Amil2-23 | 29      | 1  | 1.000 | 0.000 | 0.000 | 0.000 | 0.000 | #N/A   |        |
|          | Amil2-10 | 29      | 2  | 1.035 | 0.087 | 0.034 | 0.034 | 0.034 | -0.018 |        |
|          | Amil2-12 | 29      | 1  | 1.000 | 0.000 | 0.000 | 0.000 | 0.000 | #N/A   |        |
|          | 10366m5  | 29      | 7  | 4.335 | 1.653 | 0.621 | 0.769 | 0.783 | 0.193  |        |
|          | WAHs     | 8346m3  | 18 | 2     | 1.117 | 0.215 | 0.111 | 0.105 | 0.108  | -0.059 |
|          |          | 11401m4 | 18 | 6     | 2.711 | 1.283 | 0.389 | 0.631 | 0.649  | 0.384  |
| 8499m4   |          | 18      | 4  | 1.600 | 0.746 | 0.222 | 0.375 | 0.386 | 0.407  |        |
| Amil2-2  |          | 18      | 3  | 1.742 | 0.730 | 0.500 | 0.426 | 0.438 | -0.174 |        |
| Amil2-23 |          | 18      | 1  | 1.000 | 0.000 | 0.000 | 0.000 | 0.000 | #N/A   |        |
| Amil2-10 |          | 18      | 2  | 1.117 | 0.215 | 0.111 | 0.105 | 0.108 | -0.059 |        |
| Amil2-12 |          | 18      | 1  | 1.000 | 0.000 | 0.000 | 0.000 | 0.000 | #N/A   |        |
| 10366m5  |          | 16      | 6  | 4.971 | 1.681 | 0.500 | 0.799 | 0.825 | 0.374  |        |

| Pop      | Locus    | N       | Na | Ne    | I     | Ho    | He    | UHe   | F      |        |
|----------|----------|---------|----|-------|-------|-------|-------|-------|--------|--------|
| KOC      | 8346m3   | 30      | 3  | 1.070 | 0.169 | 0.067 | 0.065 | 0.066 | -0.026 |        |
|          | 11401m4  | 30      | 8  | 5.521 | 1.849 | 0.867 | 0.819 | 0.833 | -0.058 |        |
|          | 8499m4   | 29      | 6  | 1.679 | 0.859 | 0.483 | 0.404 | 0.411 | -0.194 |        |
|          | Amil2-2  | 30      | 4  | 1.272 | 0.472 | 0.067 | 0.214 | 0.218 | 0.688  |        |
|          | Amil2-23 | 30      | 4  | 1.107 | 0.253 | 0.100 | 0.097 | 0.098 | -0.034 |        |
|          | Amil2-10 | 30      | 2  | 1.034 | 0.085 | 0.033 | 0.033 | 0.033 | -0.017 |        |
|          | Amil2-12 | 30      | 1  | 1.000 | 0.000 | 0.000 | 0.000 | 0.000 | #N/A   |        |
|          | 10366m5  | 30      | 6  | 3.930 | 1.518 | 0.833 | 0.746 | 0.758 | -0.118 |        |
|          | TUK      | 8346m3  | 23 | 3     | 1.301 | 0.446 | 0.174 | 0.232 | 0.237  | 0.249  |
|          |          | 11401m4 | 23 | 7     | 3.963 | 1.591 | 0.783 | 0.748 | 0.764  | -0.047 |
| 8499m4   |          | 20      | 4  | 1.695 | 0.800 | 0.400 | 0.410 | 0.421 | 0.024  |        |
| Amil2-2  |          | 22      | 4  | 1.517 | 0.646 | 0.409 | 0.341 | 0.349 | -0.200 |        |
| Amil2-23 |          | 23      | 1  | 1.000 | 0.000 | 0.000 | 0.000 | 0.000 | #N/A   |        |
| Amil2-10 |          | 22      | 3  | 1.148 | 0.292 | 0.136 | 0.129 | 0.132 | -0.056 |        |
| Amil2-12 |          | 22      | 1  | 1.000 | 0.000 | 0.000 | 0.000 | 0.000 | #N/A   |        |
| 10366m5  |          | 22      | 6  | 4.017 | 1.510 | 0.500 | 0.751 | 0.768 | 0.334  |        |
| TOI      |          | 8346m3  | 25 | 4     | 1.228 | 0.420 | 0.200 | 0.186 | 0.189  | -0.078 |
|          |          | 11401m4 | 20 | 8     | 5.442 | 1.827 | 0.850 | 0.816 | 0.837  | -0.041 |
|          | 8499m4   | 25      | 6  | 1.611 | 0.850 | 0.360 | 0.379 | 0.387 | 0.051  |        |
|          | Amil2-2  | 22      | 5  | 1.847 | 0.884 | 0.364 | 0.459 | 0.469 | 0.207  |        |
|          | Amil2-23 | 25      | 3  | 1.176 | 0.324 | 0.160 | 0.150 | 0.153 | -0.070 |        |
|          | Amil2-10 | 25      | 2  | 1.041 | 0.098 | 0.040 | 0.039 | 0.040 | -0.020 |        |
|          | Amil2-12 | 25      | 1  | 1.000 | 0.000 | 0.000 | 0.000 | 0.000 | #N/A   |        |
|          | 10366m5  | 25      | 6  | 4.545 | 1.608 | 0.560 | 0.780 | 0.796 | 0.282  |        |
|          | KAHyn    | 8346m3  | 24 | 3     | 1.135 | 0.274 | 0.125 | 0.119 | 0.121  | -0.051 |
|          |          | 11401m4 | 24 | 6     | 2.730 | 1.323 | 0.417 | 0.634 | 0.647  | 0.342  |
| 8499m4   |          | 24      | 6  | 1.426 | 0.700 | 0.167 | 0.299 | 0.305 | 0.442  |        |
| Amil2-2  |          | 24      | 8  | 3.105 | 1.501 | 0.708 | 0.678 | 0.692 | -0.045 |        |
| Amil2-23 |          | 24      | 2  | 1.280 | 0.377 | 0.250 | 0.219 | 0.223 | -0.143 |        |
| Amil2-10 |          | 24      | 3  | 1.237 | 0.404 | 0.125 | 0.192 | 0.196 | 0.348  |        |
| Amil2-12 |          | 24      | 2  | 1.043 | 0.101 | 0.042 | 0.041 | 0.042 | -0.021 |        |
| 10366m5  |          | 24      | 7  | 3.789 | 1.514 | 0.708 | 0.736 | 0.752 | 0.038  |        |
| KAHae    |          | 8346m3  | 14 | 2     | 1.074 | 0.154 | 0.071 | 0.069 | 0.071  | -0.037 |
|          |          | 11401m4 | 13 | 5     | 1.977 | 1.024 | 0.308 | 0.494 | 0.514  | 0.377  |
|          | 8499m4   | 13      | 3  | 1.266 | 0.431 | 0.231 | 0.210 | 0.218 | -0.099 |        |
|          | Amil2-2  | 14      | 5  | 3.698 | 1.443 | 0.643 | 0.730 | 0.757 | 0.119  |        |
|          | Amil2-23 | 14      | 2  | 1.690 | 0.598 | 0.429 | 0.408 | 0.423 | -0.050 |        |
|          | Amil2-10 | 14      | 4  | 1.675 | 0.761 | 0.357 | 0.403 | 0.418 | 0.114  |        |
|          | Amil2-12 | 14      | 2  | 1.074 | 0.154 | 0.071 | 0.069 | 0.071 | -0.037 |        |
|          | 10366m5  | 14      | 7  | 6.031 | 1.852 | 0.500 | 0.834 | 0.865 | 0.401  |        |
|          | OAH      | 8346m3  | 9  | 3     | 1.573 | 0.655 | 0.111 | 0.364 | 0.386  | 0.695  |
|          |          | 11401m4 | 9  | 5     | 2.077 | 1.051 | 0.333 | 0.519 | 0.549  | 0.357  |
| 8499m4   |          | 9       | 4  | 2.656 | 1.168 | 0.667 | 0.623 | 0.660 | -0.069 |        |
| Amil2-2  |          | 9       | 3  | 2.314 | 0.937 | 0.444 | 0.568 | 0.601 | 0.217  |        |
| Amil2-23 |          | 9       | 2  | 1.528 | 0.530 | 0.222 | 0.346 | 0.366 | 0.357  |        |
| Amil2-10 |          | 9       | 3  | 1.588 | 0.684 | 0.444 | 0.370 | 0.392 | -0.200 |        |
| Amil2-12 |          | 9       | 2  | 1.117 | 0.215 | 0.111 | 0.105 | 0.111 | -0.059 |        |
| 10366m5  |          | 9       | 5  | 3.375 | 1.353 | 0.556 | 0.704 | 0.745 | 0.211  |        |
| MYK      |          | 8346m3  | 9  | 3     | 1.256 | 0.426 | 0.222 | 0.204 | 0.216  | -0.091 |
|          |          | 11401m4 | 9  | 6     | 3.600 | 1.504 | 0.444 | 0.722 | 0.765  | 0.385  |
|          | 8499m4   | 9       | 4  | 2.282 | 1.040 | 0.556 | 0.562 | 0.595 | 0.011  |        |
|          | Amil2-2  | 9       | 2  | 1.670 | 0.591 | 0.556 | 0.401 | 0.425 | -0.385 |        |
|          | Amil2-23 | 8       | 1  | 1.000 | 0.000 | 0.000 | 0.000 | 0.000 | #N/A   |        |
|          | Amil2-10 | 9       | 4  | 1.800 | 0.855 | 0.556 | 0.444 | 0.471 | -0.250 |        |
|          | Amil2-12 | 9       | 3  | 1.256 | 0.426 | 0.222 | 0.204 | 0.216 | -0.091 |        |
|          | 10366m5  | 9       | 5  | 4.378 | 1.519 | 0.778 | 0.772 | 0.817 | -0.008 |        |

Including  
recently  
appeared  
populations

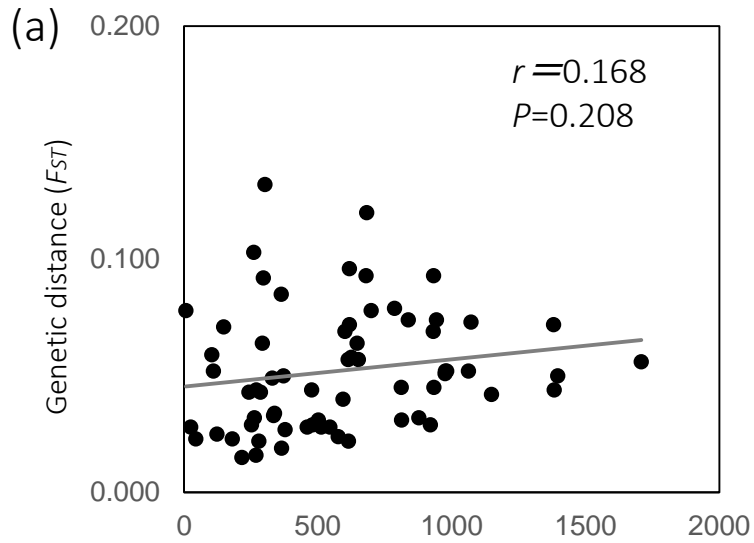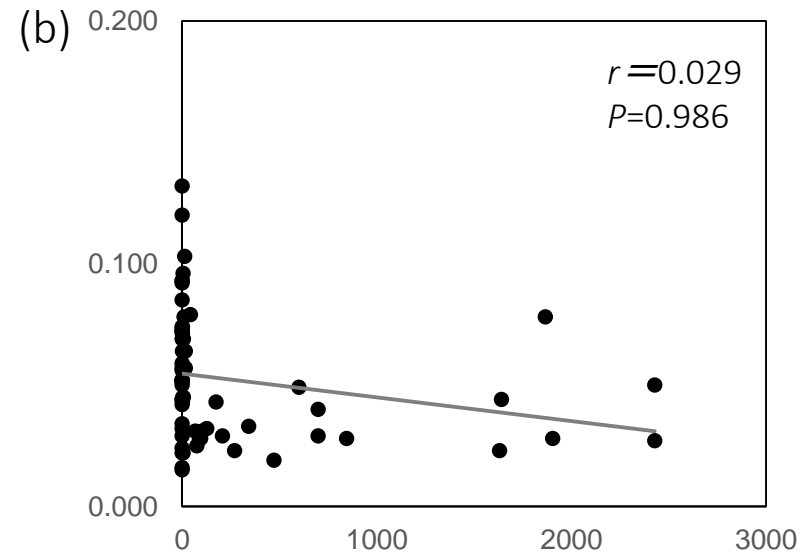

Excluding  
recently  
appeared  
populations

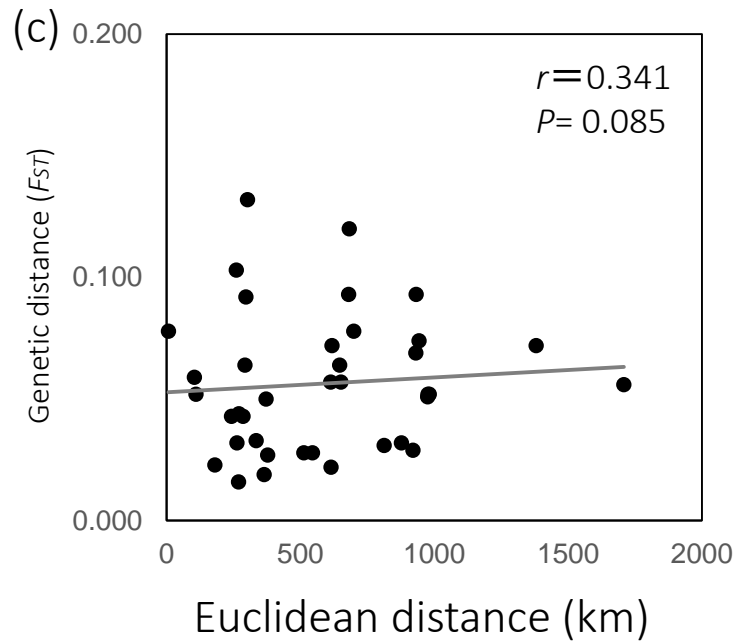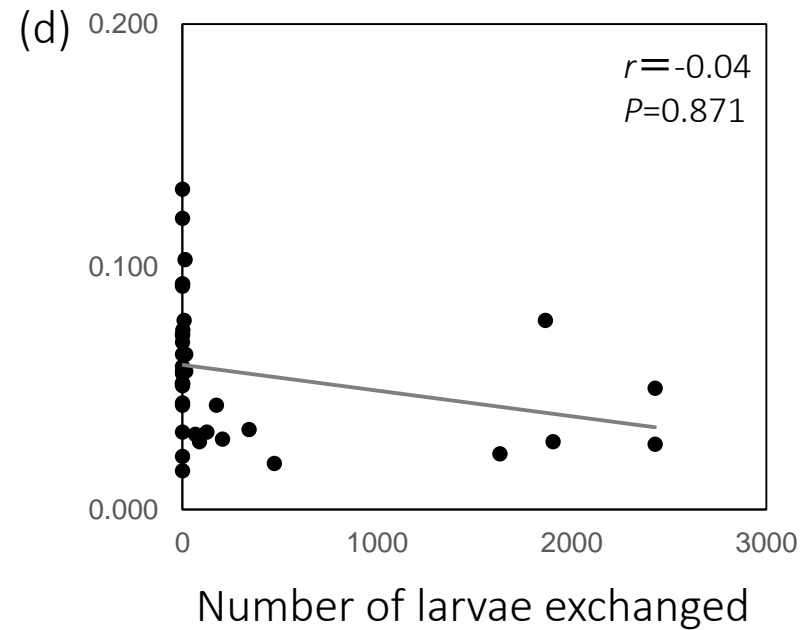

**Suppl. 4** IBD patterns based on different geographic distances (a and c used Euclidean distance, b and d used number of larvae exchanged between sites based on numerical simulation) with different sample sets (a,b all populations, c,d excluding recently colonized populations).

(a)

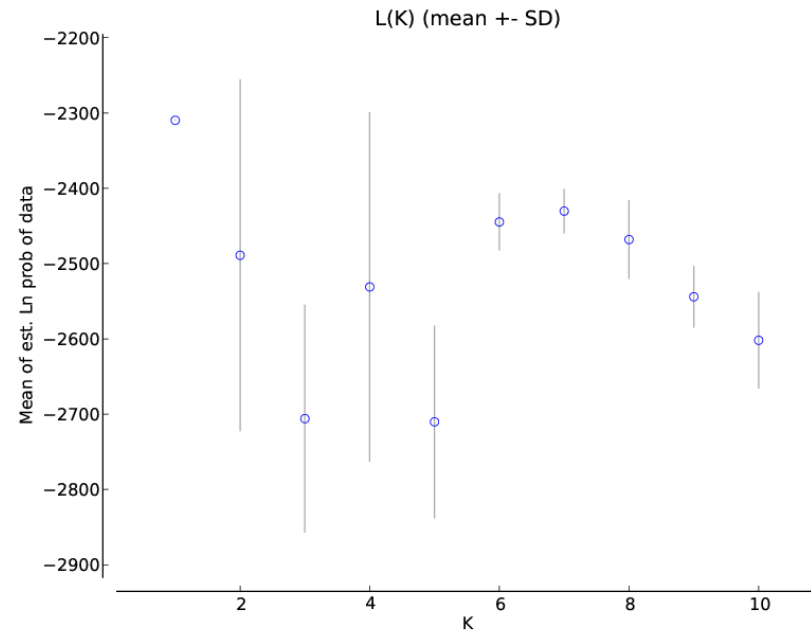

(b)

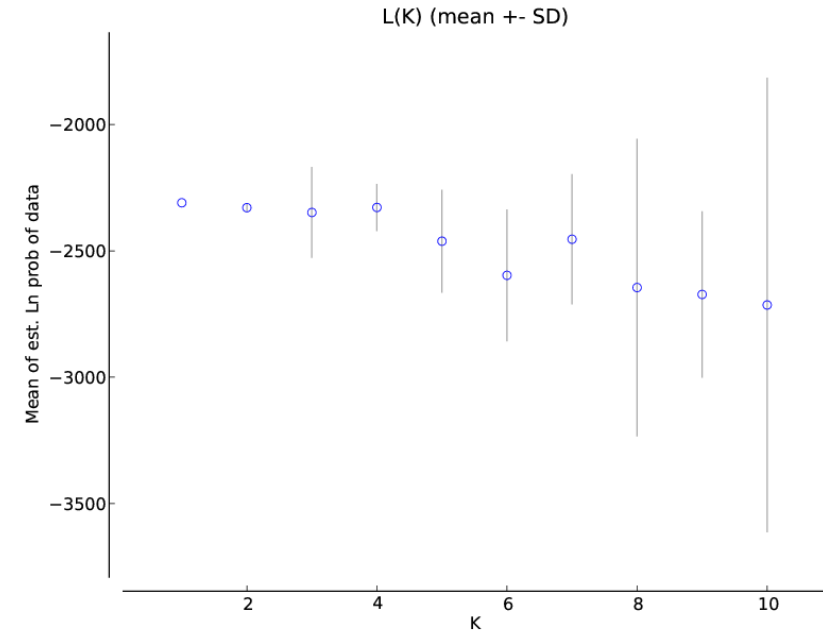

Suppl. 5 Likelihood values of STRUCTURE analysis only using green lineage (a) No prior (b) LOCPRIOR model used (temperate or subtropical regions).

**Suppl. 6** Recent migration based on assignment test results using GeneClass2. Numbers indicate the number of individuals assigned to a population. Bold face indicates self-seeding. Columns are source populations, and rows are sink populations.

| Assigned population<br>Source population |       | recently colonized in temperate |          |          | pre-existing in temperate |          |           |          |          | subtropical area |          |          |
|------------------------------------------|-------|---------------------------------|----------|----------|---------------------------|----------|-----------|----------|----------|------------------|----------|----------|
|                                          |       | GAH                             | AMK      | ZAH      | WAH                       | KOC      | TUK       | TOI      | KAHyn    | KAHae            | OAH      | MYK      |
| recently colonized in temperate area     | GAH   | <b>8</b>                        |          | 1        | 2                         |          |           |          |          |                  |          |          |
|                                          | AMK   |                                 | <b>5</b> |          |                           |          |           |          |          |                  |          |          |
|                                          | ZAH   |                                 |          | <b>2</b> |                           |          |           |          |          |                  |          |          |
| pre-existing in temperate area           | WAH   | 1                               |          |          | <b>13</b>                 |          |           |          |          |                  |          |          |
|                                          | KOC   |                                 |          |          |                           | <b>5</b> |           |          |          |                  |          |          |
|                                          | TUK   |                                 |          |          | 1                         |          | <b>21</b> | 1        |          |                  |          |          |
|                                          | TOI   |                                 |          |          |                           |          |           | <b>6</b> |          |                  |          |          |
| subtropical area                         | KAHyn |                                 |          |          |                           |          |           |          | <b>9</b> |                  |          |          |
|                                          | KAHae |                                 |          |          |                           | 1        |           |          |          | <b>9</b>         |          |          |
|                                          | OAH   |                                 |          |          |                           |          |           |          |          | 1                | <b>3</b> |          |
|                                          | MYK   |                                 |          |          |                           |          |           |          |          |                  |          | <b>6</b> |
| Unassigned                               |       | 10                              | 18       | 14       | 31                        | 24       | 2         | 18       | 15       | 4                | 6        | 3        |

**Suppl. 7** Environmental parameters of different regions. Data from NASA Goddard Space Flight Center, O. E. L., Ocean Biology Processing Group [25] and Yara, Y. et al. [26]

| REGION       | Water temperature         | Chlorophylla   | POC                          | Aragonite saturation |
|--------------|---------------------------|----------------|------------------------------|----------------------|
|              | average lowest month (°C) | average (µl/L) | average (mg/m <sup>3</sup> ) | $\Omega$ -arag       |
| Okinawa      | 21.98                     | 0.17           | 54.24                        | 3.30                 |
| Yakushima    | 19.56                     | 0.26           | 76.30                        | 3.10                 |
| Shikine      | 15.85                     | 0.43           | 101.75                       | 2.60                 |
| Amakusa-Goto | 15.47                     | 0.64           | 174.91                       | 2.90                 |

[25] NASA Goddard Space Flight Center, Ocean Ecology Laboratory, Ocean Biology Processing Group; (2018): MODIS-Aqua Level-2 Ocean Color Data Version, NASA OB.DAAC. <http://doi.org/10.5067/AQUA/MODIS/L2/OC/2018>. Accessed on 2018/01/01.

[26] Ocean acidification limits temperature-induced poleward expansion of coral habitats around Japan. *Biogeosciences* 9, 4955-4968 (2012).



Suppl. 8 Microsatellite markers used in this study.

| Microsatellite locus | Primer F                    | Primer R                 | Repeat motif   | Color        | Multiplex | Reference                       |
|----------------------|-----------------------------|--------------------------|----------------|--------------|-----------|---------------------------------|
| 8346m3               | CGACAAAGATTGGAGACCC         | TTTCAATGCAGTGTGATTCC     | (ATT)12        | FAM (Blue)   | Plex 1    | Shinzato et al., 2014           |
| 11401m4              | TGCAGACAGAACCGAGAAGG        | TGGGCCACGATTCTTACG       | (ATTT)8        | NED (Yellow) |           |                                 |
| 8499m4               | AAACCGTGGGTTAAGGGC          | CGATGGAATTATTCGCGG       | (CGGT)5        | PET (Red)    |           |                                 |
| 10366m5              | CAACGACTGAAAGGCAGC          | GGCTTTGACTTTTATGTCC      | (AAAAC)5       | NED (Yellow) |           |                                 |
| Amil2-2h             | AATAACCCCTTCTACCTCTCT       | TCTACAGCCGATTGTCAAGG     | (CA)8          | PET (Red)    | Plex2     | modified van Oppen et al., 2007 |
| Amil2-23h            | GTGTTACTGCATCAAAGTCTG       | GTGAGCATCCAAAGGTTTCC     | (CT)5          | NED (Yellow) |           |                                 |
| Amil2-10             | CAGCGATTAATATTTTAGAACAGTTTT | CGTATAAACAAATTCCATGGTCTG | TA(TG)11       | FAM (Blue)   |           | van Oppen et al., 2007          |
| Amil2-12             | TTTTAAAATGTGAAATGCATATGACA  | TCACCTGGGTCCATTCT        | GA(CA)6GA(CA)2 | VIC (Green)  |           |                                 |

## Suppl. 10 Distances and the simulated larval dispersal exchange between pairs of populations

| category | Pairwise comparison |       | Linearized Fst | straightline distance | oceanographic distance | 42d simulation 1 generation | 42 simulation multiple generation | 42 d simulation multiple generation_lg |
|----------|---------------------|-------|----------------|-----------------------|------------------------|-----------------------------|-----------------------------------|----------------------------------------|
|          |                     |       |                |                       |                        |                             |                                   |                                        |
| recent   | GAHo                | GAHk  | 0.078          | 7.1                   | 7.33                   | 1704                        | 1.9E+03                           | 5E-04                                  |
| recent   |                     | AMK   | 0.059          | 108.04                | 110.31                 | 1E-24                       | 1.1E-01                           | 9E+00                                  |
| recent   |                     | ZAH   | 0.052          | 976.9                 | 1423.44                | 1E-24                       | 6.8E-02                           | 1E+01                                  |
| recent   |                     | WAHk  | 0.064          | 646.47                | 919.78                 | 2                           | 1.6E+01                           | 6E-02                                  |
| recent   |                     | WAHs  | 0.057          | 612.77                | 897.77                 | 1E-24                       | 2.0E-01                           | 5E+00                                  |
| recent   |                     | KOC   | 0.050          | 372.32                | 628.49                 | 2231                        | 2.4E+03                           | 4E-04                                  |
| recent   |                     | TUK   | 0.102          | 264.21                | 436.04                 | 415                         | 5.1E+02                           | 2E-03                                  |
| recent   |                     | TOI   | 0.032          | 265.16                | 386.92                 | 1E-24                       | 1.1E-01                           | 9E+00                                  |
| recent   |                     | KAHyn | 0.043          | 285.27                | 311.47                 | 1E-24                       | 5.2E-01                           | 2E+00                                  |
| recent   |                     | KAHae | 0.092          | 475.29                | 1428.37                | 1E-24                       | 1.1E-02                           | 9E+01                                  |
| recent   |                     | OAH   | 0.093          | 679.58                | 1161.03                | 1E-24                       | 3.5E-05                           | 3E+04                                  |
| recent   |                     | MYK   | 0.069          | 933.26                | 1034.22                | 1E-24                       | 1.8E-07                           | 6E+06                                  |
| recent   | GAHk                | AMK   | 0.052          | 114.25                | 105.09                 | 1E-24                       | 1.1E-01                           | 9E+00                                  |
| recent   |                     | ZAH   | 0.052          | 981.76                | 1412.67                | 1E-24                       | 6.8E-02                           | 1E+01                                  |
| recent   |                     | WAHk  | 0.057          | 651.67                | 915.69                 | 2                           | 1.6E+01                           | 6E-02                                  |
| recent   |                     | WAHs  | 0.072          | 617.75                | 894.58                 | 1E-24                       | 2.0E-01                           | 5E+00                                  |
| recent   |                     | KOC   | 0.027          | 378                   | 622.98                 | 2231                        | 2.4E+03                           | 4E-04                                  |
| recent   |                     | TUK   | 0.169          | 271.27                | 432.45                 | 415                         | 5.1E+02                           | 2E-03                                  |
| recent   |                     | TOI   | 0.044          | 272.25                | 381.67                 | 1E-24                       | 1.1E-01                           | 9E+00                                  |
| recent   |                     | KAHyn | 0.064          | 291.79                | 307.7                  | 1E-24                       | 5.2E-01                           | 2E+00                                  |
| recent   |                     | KAHae | 0.132          | 479.88                | 1423.95                | 1E-24                       | 1.1E-02                           | 9E+01                                  |
| recent   |                     | OAH   | 0.120          | 682.61                | 1145.58                | 1E-24                       | 3.5E-05                           | 3E+04                                  |
| recent   |                     | MYK   | 0.093          | 934.54                | 1034.91                | 1E-24                       | 1.8E-07                           | 6E+06                                  |
| recent   | AMK                 | ZAH   | 0.032          | 874.16                | 1513.76                | 1E-24                       | 1.3E+02                           | 8E-03                                  |
| recent   |                     | WAHk  | 0.028          | 541.88                | 1011.11                | 23                          | 8.8E+01                           | 1E-02                                  |
| recent   |                     | WAHs  | 0.028          | 509.7                 | 986.3                  | 1173                        | 1.9E+03                           | 5E-04                                  |
| recent   |                     | KOC   | 0.016          | 265.49                | 720.82                 | 1E-24                       | 2.3E-02                           | 4E+01                                  |
| recent   |                     | TUK   | 0.128          | 171.49                | 520.13                 | 1E-24                       | 2.1E-02                           | 5E+01                                  |
| recent   |                     | TOI   | 0.023          | 176.31                | 472.99                 | 505                         | 1.6E+03                           | 6E-04                                  |
| recent   |                     | KAHyn | 0.043          | 237.13                | 406.35                 | 28                          | 1.7E+02                           | 6E-03                                  |
| recent   |                     | KAHae | 0.103          | 468.39                | 1515                   | 11.33045623                 | 1.3E+01                           | 8E-02                                  |
| recent   |                     | OAH   | 0.078          | 697.01                | 1250.82                | 9.15434606                  | 9.2E+00                           | 1E-01                                  |
| recent   |                     | MYK   | 0.051          | 974.86                | 1126.35                | 1E-24                       | 3.6E-02                           | 3E+01                                  |
| recent   | ZAH                 | WAHk  | 0.033          | 334.48                | 637.46                 | 79                          | 3.4E+02                           | 3E-03                                  |
| recent   |                     | WAHs  | 0.019          | 364.45                | 709.68                 | 94                          | 4.7E+02                           | 2E-03                                  |
| recent   |                     | KOC   | 0.022          | 613.22                | 875.59                 | 1E-24                       | 4.1E-02                           | 2E+01                                  |
| recent   |                     | TUK   | 0.108          | 797.3                 | 1034.32                | 1E-24                       | 1.0E-02                           | 1E+02                                  |
| recent   |                     | TOI   | 0.031          | 808.66                | 1050.94                | 1E-24                       | 6.6E+01                           | 2E-02                                  |
| recent   |                     | KAHyn | 0.029          | 920.71                | 1158.41                | 51                          | 2.1E+02                           | 5E-03                                  |
| recent   |                     | KAHae | 0.074          | 1135.32               | 1486                   | 1E-24                       | 1.9E+00                           | 5E-01                                  |
| recent   |                     | OAH   | 0.072          | 1381.01               | 2248.71                | 1E-24                       | 8.4E-03                           | 1E+02                                  |
| recent   |                     | MYK   | 0.056          | 1705.74               | 2129.23                | 1E-24                       | 2.8E-05                           | 4E+04                                  |

| category    | Pairwise comparison |       | Linearized Fst | straightline distance | oceanographic distance | 42d simulation 1 generation | 42 simulation multiple generation | 42 d simulation multiple generation_lg |
|-------------|---------------------|-------|----------------|-----------------------|------------------------|-----------------------------|-----------------------------------|----------------------------------------|
|             |                     |       |                |                       |                        |                             |                                   |                                        |
| Pre-exsited | WAHk                | WAHs  | 0.023          | 44.18                 | 62.64                  | 201                         | 2.7E+02                           | 4E-03                                  |
| Pre-exsited |                     | KOC   | 0.022          | 278.94                | 362.95                 | 1                           | 4.2E+00                           | 2E-01                                  |
| Pre-exsited |                     | TUK   | 0.118          | 465.35                | 524.88                 | 2                           | 3.7E+00                           | 3E-01                                  |
| Pre-exsited |                     | TOI   | 0.029          | 477.32                | 540.97                 | 558                         | 7.0E+02                           | 1E-03                                  |
| Pre-exsited |                     | KAHyn | 0.040          | 593.77                | 646.79                 | 558                         | 7.0E+02                           | 1E-03                                  |
| Pre-exsited |                     | KAHae | 0.096          | 822.23                | 985.68                 | 1E-24                       | 4.0E+00                           | 3E-01                                  |
| Pre-exsited |                     | OAH   | 0.073          | 1072.97               | 1751.5                 | 1E-24                       | 1.4E-02                           | 7E+01                                  |
| Pre-exsited |                     | MYK   | 0.050          | 1393.67               | 1623.42                | 1E-24                       | 3.0E-02                           | 3E+01                                  |
| Pre-exsited | WAHs                | KOC   | 0.029          | 250.93                | 341.41                 | 1E-24                       | 4.9E-02                           | 2E+01                                  |
| Pre-exsited |                     | TUK   | 0.099          | 444.37                | 507.04                 | 1E-24                       | 3.9E-02                           | 3E+01                                  |
| Pre-exsited |                     | TOI   | 0.028          | 456.99                | 519.7                  | 334                         | 8.5E+02                           | 1E-03                                  |
| Pre-exsited |                     | KAHyn | 0.024          | 576.63                | 629.14                 | 1E-24                       | 2.1E-01                           | 5E+00                                  |
| Pre-exsited |                     | KAHae | 0.069          | 811.42                | 941.76                 | 1E-24                       | 5.7E+00                           | 2E-01                                  |
| Pre-exsited |                     | OAH   | 0.052          | 1063.25               | 1736.32                | 1E-24                       | 2.5E-02                           | 4E+01                                  |
| Pre-exsited |                     | MYK   | 0.044          | 1381.69               | 1612.41                | 1E-24                       | 3.0E-02                           | 3E+01                                  |
| Pre-exsited | KOC                 | TUK   | 0.105          | 201.46                | 237.87                 | 1429                        | 1.6E+03                           | 6E-04                                  |
| Pre-exsited |                     | TOI   | 0.015          | 215.28                | 256.56                 | 1E-24                       | 2.5E-02                           | 4E+01                                  |
| Pre-exsited |                     | KAHyn | 0.034          | 339.96                | 359.7                  | 1E-24                       | 5.4E-02                           | 2E+01                                  |
| Pre-exsited |                     | KAHae | 0.085          | 588.32                | 683.25                 | 1E-24                       | 2.1E-03                           | 5E+02                                  |
| Pre-exsited |                     | OAH   | 0.074          | 840.14                | 1451.37                | 1E-24                       | 7.2E-06                           | 1E+05                                  |
| Pre-exsited |                     | MYK   | 0.042          | 1150.26               | 1336.68                | 1E-24                       | 5.1E-08                           | 2E+07                                  |
| Pre-exsited | TUK                 | TOI   | 0.068          | 14.45                 | 37.29                  | 1E-24                       | 2.0E-02                           | 5E+01                                  |
| Pre-exsited |                     | KAHyn | 0.062          | 139.58                | 161.9                  | 1E-24                       | 5.4E-02                           | 2E+01                                  |
| Pre-exsited |                     | KAHae | 0.087          | 392.08                | 533.97                 | 1E-24                       | 4.8E-04                           | 2E+03                                  |
| Pre-exsited |                     | OAH   | 0.087          | 642.05                | 1312.98                | 1E-24                       | 1.6E-06                           | 6E+05                                  |
| Pre-exsited |                     | MYK   | 0.100          | 949.2                 | 1183.07                | 1E-24                       | 1.5E-08                           | 7E+07                                  |
| Pre-exsited | TOI                 | KAHyn | 0.025          | 125.29                | 120.22                 | 1                           | 7.4E+01                           | 1E-02                                  |
| Pre-exsited |                     | KAHae | 0.071          | 377.63                | 499.53                 | 1E-24                       | 7.7E-01                           | 1E+00                                  |
| Pre-exsited |                     | OAH   | 0.058          | 627.67                | 1273.65                | 1E-24                       | 4.3E-01                           | 2E+00                                  |
| Pre-exsited |                     | MYK   | 0.045          | 935.16                | 1151.99                | 1E-24                       | 6.0E+00                           | 2E-01                                  |
| Pre-exsited | KAHyn               | KAHae | 0.028          | 254.04                | 1264                   | 72                          | 9.4E+01                           | 1E-02                                  |
| Pre-exsited |                     | OAH   | 0.031          | 502.68                | 1006.51                | 53                          | 1.0E+02                           | 1E-02                                  |
| Pre-exsited |                     | MYK   | 0.045          | 810.31                | 883.48                 | 1E-24                       | 3.5E+00                           | 3E-01                                  |
| Pre-exsited | KAHae               | OAH   | 0.044          | 252.47                | 533.87                 | 1014                        | 1.6E+03                           | 6E-04                                  |
| Pre-exsited |                     | MYK   | 0.079          | 571.72                | 752.09                 | 1E-24                       | 4.3E+01                           | 2E-02                                  |
| Pre-exsited | OAH                 | MYK   | 0.049          | 326                   | 487.42                 | 67                          | 6.0E+02                           | 2E-03                                  |
